# Supplementary material
Source: PubMed Central journal article supplement (PMC3265218)
Supplement: supp_45_4_740__1.pdf [file supp_45_4_740__1.pdf]

# Online Data Supplement

## Interleukin-1 Receptor-associated Kinase 3 Gene Associates with Susceptibility to Acute Lung Injury

María Pino-Yanes, Shwu-Fan Ma, Xiaoguang Sun, Paula Tejera, Almudena Corrales, Jesús Blanco, Lina Pérez-Méndez, Elena Espinosa, Arturo Muriel, Lluís Blanch, Joe G. N. García, Jesús Villar, Carlos Flores

### METHODS

#### Study design

Sample characteristics have been reported elsewhere (E1) consisting on unrelated cases and controls of Spanish descent. Cases fulfilled the international criteria for severe sepsis (E2) and basic demographic data, severity of illness scores and clinical information until discharge from the ICU, including source of infection and development of organ dysfunction, were recorded. All patients were followed prospectively for the development of ALI, as defined by the American-European Consensus Conference (E3). The median APACHE II score was 24 (IQR=18-27) and 184 patients (86%) developed ALI/ARDS. The overall ICU mortality was 45.5%. In agreement with previous studies (E4), no pathogens were identified in blood cultures as the causative microorganism for sepsis albeit having an identified site of infection for 50.8% of patients. Controls were randomly drawn from a population-based study of about 7000 samples from unrelated individuals as a representation of the general Spanish population (E5). A health survey consisting on a 2-hour personal interview by trained personnel aiming to characterize occupational and environmental risk factors for common acute and chronic health conditions (supported by personal or familiar medical records) in the population was obtained from all controls. The study sample size was based on *a priori* power calculation for the primary outcome, indicating 80% power to detect a risk of 1.8 at  $p=0.05$

significance level assuming an allele frequency of 30%.

#### *IRAK3* gene polymorphism identification

To study the variation in the *IRAK3* gene, 22.6 kilobases (kb) of non-repetitive gene regions in DNA samples were sequenced in 32 unrelated healthy Spanish individuals. The genomic sequence from the reference assembly (NC\_000012.10) was filtered for interspersed repeats and low complexity DNA sequences using RepeatMasker (<http://www.repeatmasker.org>). Primers for DNA amplification of non-repetitive regions were designed using Primer3 ([http://frodo.wi.mit.edu/cgi-bin/primer3/primer3\\_www.cgi](http://frodo.wi.mit.edu/cgi-bin/primer3/primer3_www.cgi)). Primer pairs used are listed in Table E1. Sequencing was performed by both strands with BigDye® v3.1 Terminator Cycle Sequencing kit (Applied Biosystems, Foster City, CA, USA) under the manufacturer's recommendations using the amplification primers. Sequencing products were ethanol precipitated and run on an ABI PRISM 310 Genetic Analyzer (Applied Biosystems). Polymorphisms were identified by manual examination of traces. The sequence variants were confirmed by two independent authors and reported following established guidelines (E6).

#### tSNPs selection

In order to efficiently and accurately study common *IRAK3* gene variation in the population, tagging single nucleotide polymorphisms (tSNPs) were

selected using TagIT 3.03 using a SNP-dropping-with-re-sampling method (E7) and tested for their ability to impute untyped variants. Given a genomic region, the allelic frequencies of untyped variants can be imputed using a set of tSNPs with high information content of the variation in the particular region, by means of linear combinations of the tSNPs haplotype frequencies. TUNA software was used to derive such estimates (E8). TUNA also allows estimating the  $M_D$  parameter, representing a multilocus measure of linkage disequilibrium (LD) (E9). This value indicates the amount of information that a set of tSNPs contains for a given untyped SNP, for which a threshold  $\geq 0.7$  has been suggested for accurate predictions to avoid power loss to detect disease associations at untyped SNPs (E8).

In order to infer the association only at those untyped SNPs for which imputation was accurate, we evaluated the accuracy of the selected 7-tSNPs set (average haplotype  $r^2=0.55$ ) in predicting allele frequencies for the remaining 51 untyped biallelic SNPs in the re-sequenced sample, obtaining an error rate from the comparison of observed vs. estimated minor allele frequencies (MAF) from:

$$Error(\%) = \frac{|MAF_{observed} - MAF_{estimated}|}{MAF_{observed}} \times 100$$

To compare the 7-tSNPs set utilized for the study with an optimal tagging alternative (i.e. with an average haplotype  $r^2=1.0$ ), we also selected an additional 15-tSNPs set using the same methodology described. For both sets, the  $M_D$  measures, observed and estimated MAFs, and error values for all untyped SNPs were derived. A high correlation ( $R^2>0.99$ ) between observed and estimated MAFs for the two tSNPs sets was found. Average errors for MAF estimates were similar between both tSNPs sets (6.7% for 15-tSNPs and 7.5% for 7-tSNPs). However, average errors were reduced by more than 20% among the untyped SNPs with  $M_D \geq 0.7$  (5.3% for 15-

tSNPs and 4.6% for 7-tSNPs) and even more (by more than 60%) among the untyped SNPs with  $MAF \geq 10\%$  (1.7% for 15-tSNPs and 2.7% for 7-tSNPs). Thus, using a threshold of  $MAFs \geq 10\%$  rather than the  $M_D \geq 0.7$ , reduced MAF error estimates at least by two-fold. This is supported by recent observations across diverse populations indicating that genotype imputation errors produced the greatest power reduction for SNPs with  $MAFs \leq 10\%$  (E10). To reduce the MAF error rate as low as possible, we considered the overlapping SNPs of both thresholds for the association study (with  $MAF \geq 10\%$  and  $M_D \geq 0.7$ ). MAF error estimates derived from these two tSNPs sets were minimal (0.7% for 15-tSNPs and 2.6% for 7-tSNPs), still allowing for the accurate imputation of more than 80% of SNPs with  $MAF \geq 10\%$  (27 SNPs for 15-tSNPs and 24 SNPs for 7-tSNPs). Worth noting, when a set of 6 tSNPs was selected to provide an average haplotype  $r^2=1.0$  for the Utah residents with ancestry from Northern and Western Europe (CEU) from HapMap Phase II (E11) and was tested against our re-sequencing sample, MAF error estimates were five-fold larger on average irrespective of MAF or  $M_D$  values (not shown).

Taken together, these data support that the utilized set of 7 tSNPs allowed accurate imputing of a similar number of untyped SNPs in the *IRAK3* gene as a set of 15 tSNPs with maximum theoretical coverage (haplotype  $r^2=1.0$ ). In addition, we adopted a conservative approach by imputing and studying the association of those 17 untyped SNPs with  $MAF \geq 10\%$  and  $M_D \geq 0.7$  to reduce errors to the minimum.

### Genotyping quality control

Genotyping was blind to case and control status. Approximately 9% of the samples were genotyped in duplicate to monitor genotyping quality. Samples used for polymorphism identification were also genotyped with this platform to test allele-

calling reliability. Genotypes were assigned using all data simultaneously. Among all 550 samples analyzed in this study, completion rate and the average confidence of automatic genotype calls were over 90% for all tSNPs assessed. Among duplicated samples, no discrepancies were found with the original genotypes for any of the SNPs, giving an estimated overall discordance rate of 0.0%. Only 3 alleles out of the 268 genotypes obtained by both sequencing and iPLEX Gold assays were discordant (1.11%; 95% CI=0.23-3.23%). Taken together, these data are indicative of accurate genotyping methods.

### Statistical analysis

Departures from Hardy-Weinberg equilibrium (HWE) were assessed using the Pearson's goodness-of-fit  $\chi^2$ -test.

Logistic regression model was constructed by backwards elimination, starting with a model including all the variables showing significant differences between septic patients with ALI and septic patients without ALI from Table 3, and maintaining in the model the variables showing  $p$ -values  $\leq 0.1$ . The final model excluded APACHE II, and considered as covariates the SNP of interest, gender (male), source of infection (extra-pulmonary) and ICU mortality.

To adjust for the multiple comparisons, a permutation procedure was also performed. The permuted  $p$ -value was calculated by testing the association of 7 tSNPs over permuted samples, obtained from 1000 swappings of the ALI and non-ALI labels, and saving best chi-square value overall loci for each single sample. This resulted in an empirical distribution of association values considering the multiple tests done.  $P$ -values adjusted for the multiple tests being performed were then obtained by comparing the observed chi-square of each tSNP in this distribution (E12). Because the permutation scheme preserves the LD structure, this provides a less stringent correction for multiple

testing in comparison to the commonly used Bonferroni correction, which assumes that all tests are independent.

Information contained in the tSNPs set was used to impute untyped SNPs in ALI and non-ALI patients and to infer the association of these SNPs by means of TUNA ver. 1.1 (E8). For this aim, PHASE 2.1 (E13) was used to estimate the haplotypes from sequencing data that were employed by TUNA software as a reference for the underlying LD across all gene variants in the population. To maintain an extra level of confidence in the imputation of untyped variation, only common well-tagged variants (i.e. with multilocus LD values  $\geq 0.7$ ) (E8) with  $MAF \geq 10\%$  were considered for this analysis. The justification for this decision is explained above.

The patterns of LD, in terms of  $r^2$  values, were explored using Haploview 3.32 (E14) and SNAP (E15). The latter was applied to plot LD across the 250 kb region centered on *IRAK3* gene for the HapMap CEU sample.

### Luciferase activity assay

PupaSuite was used to predict the putative functionality of associated SNPs, including effects on microRNA binding sites, transcription factor binding sites, splicing sites, exonic splicing enhancers, and exonic splicing silencers, using the default parameters of the on-line tool (E16). The putative *IRAK3* promoter region was identified by Cap-Analysis of Gene Expression (CAGE) and Genomatix database (<http://www.genomatix.de>). Human pulmonary artery endothelial cells (HPAEC) (Cambrex, Walkersville, MD, USA), which are known to express *IRAK3* (E17), were cultured as previously described (E18) and transfected with FuGENE 6 Transfection Reagent (Roche Applied Science, Indianapolis, IN) in Opti-MEM medium for 2 h. A plasmid with renilla luciferase gene (phRL-TK) was co-transfected with pGL3 fused constructs as transfection efficacy control. Cells were

harvested 48 h post-transfection and lysed in Passive Lysis Buffer. Luciferase activity was measured by Dual-Luciferase Assay Kits (Promega). The relative construct activities were expressed as the ratio of firefly luciferase in pGL3 to renilla luciferase in pRL-TK (RLU) following the Dual-Glo luciferase reporter assay protocols recommended by the manufacturer. Four independent

transfections and duplicate luciferase assays were performed for each condition, along with pGL3-basic vector used as a control. Values were normalized to the activity of the construct containing the reference allele rs1732887\_A (-1464A). A Student *t*-test was used for comparisons with a two-tailed statistical significance set at  $p < 0.05$ .

## REFERENCES

- E1. Villar J, Perez-Mendez L, Flores C, Maca-Meyer N, Espinosa E, Muriel A, Sanguesa R, Blanco J, Muros M, Kacmarek RM. A *CXCL2* polymorphism is associated with better outcomes in patients with severe sepsis. *Crit Care Med* 2007;35:2292-2297.
- E2. Levy MM, Fink MP, Marshall JC, Abraham E, Angus D, Cook D, Cohen J, Opal SM, Vincent JL, Ramsay G. 2001 SCCM/ESICM/ACCP/ATS/SIS international sepsis definitions conference. *Crit Care Med* 2003;31:1250-1256.
- E3. Bernard GR, Artigas A, Brigham KL, Carlet J, Falke K, Hudson L, Lamy M, Legall JR, Morris A, Spragg R. The American-European consensus conference on ARDS. Definitions, mechanisms, relevant outcomes, and clinical trial coordination. *Am J Respir Crit Care Med* 1994;149:818-824.
- E4. Baudouin SV, Saunders D, Tiangyou W, Elson JL, Poynter J, Pyle A, Keers S, Turnbull DM, Howell N, Chinnery PF. Mitochondrial DNA and survival after sepsis: A prospective study. *Lancet* 2005;366:2118-2121.
- E5. Cabrera de Leon A, Rodriguez Perez Mdel C, Almeida Gonzalez D, Dominguez Coello S, Aguirre Jaime A, Brito Diaz B, Gonzalez Hernandez A, Perez Mendez LI. [presentation of the "CDC de Canarias" Cohort: Objectives, design and preliminary results]. *Rev Esp Salud Publica* 2008;82:519-534.
- E6. Antonarakis SE. Recommendations for a nomenclature system for human gene mutations. Nomenclature working group. *Hum Mutat* 1998;11:1-3.
- E7. Ahmadi KR, Weale ME, Xue ZY, Soranzo N, Yarnall DP, Briley JD, Maruyama Y, Kobayashi M, Wood NW, Spurr NK, Burns DK, Roses AD, Saunders AM, Goldstein DB. A single-nucleotide polymorphism tagging set for human drug metabolism and transport. *Nat Genet* 2005;37:84-89.
- E8. Wen X, Nicolae DL. Association studies for untyped markers with tuna. *Bioinformatics* 2008;24:435-437.
- E9. Nicolae DL. Quantifying the amount of missing information in genetic association studies. *Genet Epidemiol* 2006;30:703-717.
- E10. Huang L, Wang C, Rosenberg NA. The relationship between imputation error and statistical power in genetic association studies in diverse populations. *Am J Hum Genet* 2009;85:692-698.
- E11. Frazer KA, Ballinger DG, Cox DR, Hinds DA, Stuve LL, Gibbs RA, Belmont JW, Boudreau A, Hardenbol P, Leal SM, Pasternak S, Wheeler DA, Willis TD, Yu F, Yang H, Zeng C, Gao Y, Hu H, Hu W, Li C, Lin W, Liu S, Pan H, Tang X, Wang J, Wang W, Yu J, Zhang B, Zhang Q, Zhao H, Zhao H, Zhou J, Gabriel SB, Barry R, Blumenstiel B, Camargo A, Defelice M, Faggart M, Goyette M, Gupta S, Moore J, Nguyen H, Onofrio RC, Parkin M, Roy J, Stahl E, Winchester E, Ziaugra L, Altshuler D, Shen Y, Yao Z, Huang W, Chu X, He Y, Jin L, Liu Y, Shen Y, Sun W, Wang H, Wang Y, Wang Y, Xiong X, Xu L, Wayne MM,

Tsui SK, Xue H, Wong JT, Galver LM, Fan JB, Gunderson K, Murray SS, Oliphant AR, Chee MS, Montpetit A, Chagnon F, Ferretti V, Leboeuf M, Olivier JF, Phillips MS, Roumy S, Sallée C, Verner A, Hudson TJ, Kwok PY, Cai D, Koboldt DC, Miller RD, Pawlikowska L, Taillon-Miller P, Xiao M, Tsui LC, Mak W, Song YQ, Tam PK, Nakamura Y, Kawaguchi T, Kitamoto T, Morizono T, Nagashima A, Ohnishi Y, Sekine A, Tanaka T, Tsunoda T, Deloukas P, Bird CP, Delgado M, Dermitzakis ET, Gwilliam R, Hunt S, Morrison J, Powell D, Stranger BE, Whittaker P, Bentley DR, Daly MJ, de Bakker PI, Barrett J, Chretien YR, Maller J, McCarroll S, Patterson N, Pe'er I, Price A, Purcell S, Richter DJ, Sabeti P, Saxena R, Schaffner SF, Sham PC, Varilly P, Altshuler D, Stein LD, Krishnan L, Smith AV, Tello-Ruiz MK, Thorisson GA, Chakravarti A, Chen PE, Cutler DJ, Kashuk CS, Lin S, Abecasis GR, Guan W, Li Y, Munro HM, Qin ZS, Thomas DJ, McVean G, Auton A, Bottolo L, Cardin N, Eyheramendy S, Freeman C, Marchini J, Myers S, Spencer C, Stephens M, Donnelly P, Cardon LR, Clarke G, Evans DM, Morris AP, Weir BS, Tsunoda T, Mullikin JC, Sherry ST, Feolo M, Skol A, Zhang H, Zeng C, Zhao H, Matsuda I, Fukushima Y, Macer DR, Suda E, Rotimi CN, Adebamowo CA, Ajayi I, Aniagwu T, Marshall PA, Nkwodimmah C, Royal CD, Leppert MF, Dixon M, Peiffer A, Qiu R, Kent A, Kato K, Niikawa N, Adewole IF, Knoppers BM, Foster MW, Clayton EW, Watkin J, Gibbs RA, Belmont JW, Muzny D, Nazareth L, Sodergren E, Weinstock GM, Wheeler DA, Yakub I, Gabriel SB, Onofrio RC, Richter DJ, Ziaugra L, Birren BW, Daly MJ, Altshuler D, Wilson RK, Fulton LL, Rogers J, Burton J, Carter NP, Clee CM, Griffiths M, Jones MC, McLay K, Plumb RW, Ross MT, Sims SK, Willey DL, Chen Z, Han H, Kang L, Godbout M, Wallenburg JC, L'Archevêque P, Bellemare G, Saeki K, Wang H, An D, Fu H, Li Q, Wang Z, Wang R, Holden AL, Brooks LD, McEwen JE, Guyer MS, Wang VO, Peterson JL, Shi M, Spiegel J, Sung LM, Zacharia LF, Collins FS, Kennedy K, Jamieson R, Stewart J. A second generation human haplotype map of over 3.1 million SNPs. *Nature* 2007;449:851-861.

E12. Westfall PH, Young SS. Resampling-based multiple testing; examples and methods for p-value adjustment. NY: John Wiley & Sons; 1993.

E13. Stephens M, Smith NJ, Donnelly P. A new statistical method for haplotype reconstruction from population data. *Am J Hum Genet* 2001;68:978-989.

E14. Barrett JC, Fry B, Maller J, Daly MJ. Haploview: Analysis and visualization of LD and haplotype maps. *Bioinformatics* 2005;21:263-265.

E15. Johnson AD, Handsaker RE, Pulit SL, Nizzari MM, O'Donnell CJ, de Bakker PI. SNAP: A web-based tool for identification and annotation of proxy SNPs using HapMap. *Bioinformatics* 2008;24:2938-2939.

E16. Conde L, Vaquerizas JM, Dopazo H, Arbiza L, Reumers J, Rousseau F, Schymkowitz J, Dopazo J. PupaSuite: Finding functional single nucleotide polymorphisms for large-scale genotyping purposes. *Nucleic Acids Res* 2006;34:W621-625.

E17. Karoly ED, Li Z, Dailey LA, Hyseni X, Huang YC. Up-regulation of tissue factor in human pulmonary artery endothelial cells after ultrafine particle exposure. *Environ Health Perspect* 2007;115:535-540.

E18. Garcia JG, Liu F, Verin AD, Birukova A, Dechert MA, Gerthoffer WT, Bamberg JR, English D. Sphingosine 1-phosphate promotes endothelial cell barrier integrity by EDG-dependent cytoskeletal rearrangement. *J Clin Invest* 2001;108:689-701.

## SUPPLEMENTARY RESULTS

**Table E1.** Primers used for polymorphism discovery in *IRAK3* gene

| Fragment | Forward primer              | Reverse primer             | Size* |
|----------|-----------------------------|----------------------------|-------|
| 1        | ATCGAAATTCTTGCCCACAC        | GAAAAGACACCAAATCAGCGTA     | 538   |
| 2        | AGTTCGCACTCTGCTTGTC         | CTGCATCCAACCCAGGAA         | 531   |
| 3        | CAGCGTGAAAGCATCTTCTG        | GGCCTTCTGCTAGTCCTGGT       | 562   |
| 4        | GCCTGCTGGAAGTGTTGAGT        | CCCCATTCACCAACATTA AAC     | 530   |
| 5        | AGGACCACCCAAATGAGAA         | ATGACCACCTGCACAATGAA       | 566   |
| 6        | TTCATTGTGCAGGTGGTCAT        | AAGAAGCTGGACCCTCAACC       | 550   |
| 7        | CCAGTGTGTGCAGGATAAGG        | GGTGTGAGCTGCTCCAAATA       | 550   |
| 8        | CCTTGGTGTTGAGGGTGAAT        | TGCAGAAATCACGTCTCCAT       | 543   |
| 9        | CTGAAAGGGGACACGTAAGG        | TCCTGTGACTTGGCTGAGAA       | 533   |
| 10       | GCTACTATTGCCACCCGATG        | CGTTCCTGCTACCCTTTGAA       | 522   |
| 11       | CCTAAACTTTCCCTTTGCTGAA      | GCATGAAGACAGGCCTCTAAC      | 558   |
| 12       | TGGCATTGGATAGTCTTTGC        | TGCCTCTGTGTCTCTTCCAG       | 539   |
| 13       | AACGAAAAATTGGGCATGG         | CCAATGGGAGACTTCAAAGG       | 551   |
| 14       | CATTAGCAGAAGGCAGGTGA        | CACAAGAAAATGTGAAGCTGGA     | 519   |
| 15       | AGGGACTTTCCAGCTTCACA        | TGGAACAAACAGAACAGGTGA      | 563   |
| 16       | TGGGTCTGTGCATGCCTTA         | TTCACTTGCTCAGTCAACTTCA     | 555   |
| 17       | TTCCCTTTGTCTTTTGCACAT       | TTGAAACATCAACTCAATCAATTACA | 528   |
| 18       | GCCACCGTGGACAGATTTAT        | GGGCTGTATGGGCACTAAAA       | 531   |
| 19       | CGTAATGTTGCATGGGAATG        | TGCAAAACACCAACCAAAAA       | 515   |
| 20       | TTGGTTGGTGTTTTGCATGT        | TTAGCCAATGGAGCCTTAACA      | 591   |
| 21       | TTAAAATAACTTCAATTTGATTGACAC | TTGGCTATGTCCTTCAGAACC      | 553   |
| 22       | AAGGCTTTGGTTCTTCAACA        | TAGAGAAAGGCCAGGAACC        | 568   |
| 23       | CTCTGTGGAATGGTGGGAAC        | CTGGGGATGGAAGCATTTA        | 548   |
| 24       | TAGTGCTAGCCTGCCCTGAT        | TTGCTATCTTTTATGTGCTTCTGTG  | 518   |
| 25       | GGGGCTAATGGATTGTTGAA        | GGAAAGGAGGAAATGGTGAAA      | 558   |
| 26       | GGCTATTCCTGGGGTACCAT        | CCTCGAGAAAGGAGGGAAAA       | 523   |
| 27       | CCTGGCTTTTGGCTTAACCT        | CTGGTTGGTTCTCCTGCAAC       | 579   |
| 28       | ATTCCCACCTCCACCTTACT        | TTGATGCCA ACTCACTGGAG      | 531   |
| 29       | TCACCCACCTTGCTATCTA         | TGGGGATACTCAAAGTATGATTCT   | 600   |
| 30       | TGGGGACAGAGGGTCACTAA        | GGCTAAAGATGGCTCACAGC       | 559   |
| 31       | AAGAGGAGGCCAGTTCTTCC        | ACAGGCAGGGACACATTGAT       | 389   |
| 32       | CAGGCATGTGTCAGGGTATG        | TCCATTGTTCACTCCTCCAA       | 648   |
| 33       | CCGCGTCTCCGATATTATT         | ATTCACACTTTGGGCACCAG       | 544   |
| 34       | TCCCTCCTAGCCCTTAGTGA        | TTGCATTCCCTGTAGGCTTT       | 534   |
| 35       | CCACCACTCTAATCCCAAC         | AGGCAGGTCTGAGAGACACA       | 596   |
| 36       | AAGGTAATGGACATAGGATGGA      | CCAGAGATAAAGAGGACCCAAC     | 600   |
| 37       | AGCCTGCAGGTTCTAGGAGA        | CTGAATCCCCCAAACAATG        | 550   |
| 38       | AGGGGATGGCCTCTCTGTTA        | GGCCATCAACAAGATGTGAA       | 545   |
| 39       | CCAAAGTTGAAGGGCAGAAG        | GGTGGCAAGGGAATTGTAAA       | 545   |
| 40       | GGAATTGCATGCCTTTCTGT        | AGCGCAGAGCCACTAACTTG       | 564   |
| 41       | GCTAACAGGAAATCAATGAGTCAA    | GCTAACAGGAAATCAATGAGTCAA   | 545   |
| 42       | TTGACTCATTGATTCCTGTTAGC     | AGATTTTCCATGGTTCTGTGG      | 548   |
| 43       | GGTGGCAAATCTGAGGCTTA        | AGAAGAACTGGGCATGTTGC       | 560   |
| 44       | CCTTCTGATGAAGGCCTGAG        | AATTGAGCGTGGATTTGGTC       | 558   |
| 45       | TCCAAATTTTCTGGGATGA         | CAAGCAGGCTAGTCAGGGATT      | 578   |
| 46       | GGCCATCTCTTCAGAGCCTA        | GTTCTCCCACTGCTTACCG        | 532   |
| 47       | AGTCTCCCATCAGGTCTT          | AGCAAAGTGAGGTCCACCAT       | 589   |

\*Amplification product in base pairs.

**Table E2.** Summary of *IRAK3* gene re-sequencing in population controls (tSNPs are in bold and underlined)

| #         | Position* | Location (effect)               | rs/ss#      | 5'†         | 3'†        | MAF‡ | Val§ |
|-----------|-----------|---------------------------------|-------------|-------------|------------|------|------|
| 1         | 64867853  | -1494T>C                        | rs1732888   | TGCCAGTTTT  | AGATACATTT | 0.28 | //   |
| 2         | 64867883  | -1464A>G                        | rs1732887   | ATTTTCGCTG  | CAAAACCATT | 0.25 | //   |
| 3         | 64868152  | -1195C>T                        | rs2701653   | TTCAAACAA   | AATTTTACTT | 0.11 | //   |
| 4         | 64870002  | c.133+523T>G                    | rs11465939  | TTTACCCAAT  | TCGTTGAATG | 0.02 | //   |
| 5         | 64870029  | c.133+550A>G                    | rs1732886   | TATGCTAAAG  | GTGGCTTTTT | 0.28 | //   |
| 6         | 64870071  | c.133+592G>A                    | rs11465940  | CTTCAGAACT  | TATTTTATGC | 0.02 | ††   |
| <b>7</b>  | 64871319  | c.133+1841_1853delGGAAGTGGTCAGT | ss289570834 | CAAAAATTGA  | AATTATTCAA | 0.30 | §§   |
| 8         | 64871396  | c.133+1917C>G                   | rs1625441   | GCTGCCTGGG  | TAGTTGCTAC | 0.50 | //   |
| 9         | 64872005  | c.133+2526T>A                   | rs2701654   | GCAGCCTATA  | GATATGACCA | 0.06 | //   |
| 10        | 64872107  | c.133+2628C>T                   | rs2576183   | ACTCCTAGAG  | TGCTGATTCA | 0.07 | **   |
| 11        | 64872409  | c.133+2931T>C                   | rs56156535  | TTATGGCTTT  | AGTGAAAGCA | 0.39 | **   |
| 12        | 64872503  | c.133+3024C>T                   | rs11176084  | GGAGACAACT  | ATCTGATTAC | 0.03 | //   |
| 13        | 64876748  | c.134-7010T>C                   | rs1168772   | ATATATTAAC  | AGTAAGTGTT | 0.06 | //   |
| 14        | 64877754  | c.134-6004A>G                   | rs1168774   | CTTAGATGTG  | TGCAAACTCA | 0.44 | //   |
| 15        | 64877849  | c.134-5909G>C                   | rs4762088   | CTGAATCTCA  | AAATGTGCTT | 0.37 | //   |
| 16        | 64878292  | c.134-5466C>T                   | rs12823414  | GTCTGTCAAT  | AGCAAAAATA | 0.06 | //   |
| 17        | 64878509  | c.134-5249C>A                   | rs17767286  | CCTAGTTAAA  | CTTACCCAC  | 0.36 | //   |
| 18        | 64879508  | c.134-4250A>G                   | rs17767298  | CTTGTTTCA   | TCTGAAACTG | 0.34 | //   |
| 19        | 64880383  | c.134-3375T>C                   | rs1168757   | GCAAACCTC   | TCCATGTAGT | 0.08 | //   |
| 20        | 64880401  | c.134-3357C>G                   | rs1168758   | AGTGAATCAG  | ATTCAGGCT  | 0.06 | //   |
| 21        | 64880943  | c.134-2815T>C                   | rs1185253   | CTGCAACCTC  | GCCTCCTGGG | 0.08 | ††   |
| 22        | 64881027  | c.134-2731T>G                   | rs1732875   | CTGGCTAATT  | TIGTATTTTT | 0.06 | ††   |
| 23        | 64883686  | c.134-72T>A                     | rs1185630   | AATAAAACAT  | AGGTACACAA | 0.09 | //   |
| 24        | 64883968  | c.316+28C>T                     | rs1882200   | TAATGTGGCT  | TAAATCTGTA | 0.28 | //   |
| 25        | 64884556  | c.316+616A>G                    | rs1617632   | ATTTAGAACA  | CATGATCAAT | 0.02 | //   |
| 26        | 64884954  | c.316+1014T>C                   | rs2289134   | TATTAGTTCC  | AATAGACTTC | 0.34 | //   |
| 27        | 64885411  | c.316+1471T>C                   | rs1732877   | AAGACTTTAC  | GCCCTAGTAC | 0.39 | //   |
| 28        | 64886149  | c.316+2209delT                  | rs11465951  | TTTTCAATCT  | CCATTTTATA | 0.08 | //   |
| <b>29</b> | 64889666  | c.381+99C>T                     | rs11465955  | CTGGATTTGC  | GGCACTTTTT | 0.31 | //   |
| 30        | 64890247  | c.435A>G (p.Lys145Lys)          | rs56001649  | ATAATGAAAA  | GGTATGAAAA | 0.03 | //   |
| 31        | 64891273  | c.437-220A>T                    | rs2293657   | GGTAAAAATC  | CAATGCTGCT | 0.31 | //   |
| <b>32</b> | 64891495  | c.439G>A (p.Val147Ile)          | rs1152888   | TTCTAAGGA   | TACTGCTTAA | 0.10 | //   |
| 33        | 64892495  | c.588+851C>T                    | rs1821777   | CACACACAAA  | ACAGAAGAGC | 0.31 | //   |
| 34        | 64904334  | c.654-2436C>T                   | rs55715236  | CCTGAATCAT  | TTCTCAGATG | 0.30 | **   |
| 35        | 64904449  | c.654-2321G>T                   | rs1623665   | CTAATTTAAG  | GATAAGATGA | 0.39 | //   |
| <b>36</b> | 64904483  | c.654-2287G>A                   | rs1624395   | ACAGAGGAGGA | AATGATAACT | 0.38 | //   |
| 37        | 64904584  | c.654-2186G>A                   | rs1370127   | AATATTAAGG  | AATTACCTTA | 0.38 | //   |
| <b>38</b> | 64904905  | c.654-1865C>T                   | rs1370128   | AACAAGGCAC  | CAGAACATTT | 0.39 | //   |
| 39        | 64908730  | c.887+313delA                   | rs10716217  | GATTTTTTTT  | CTTACAATG  | 0.39 | //   |
| 40        | 64912239  | c.887+3822G>T                   | rs17102235  | GCTGACAATT  | TTGCCTTTCT | 0.02 | //   |
| 41        | 64912278  | c.887+3861A>G                   | ss289570833 | AAGGACTTCA  | TGTAACCCAT | 0.02 | §§   |
| 42        | 64912424  | c.887+4007G>A                   | rs726302    | TCCCTTCCAC  | GCCATTGAAC | 0.02 | //   |
| 43        | 64912865  | c.887+4448A>G                   | rs17102243  | TAATTGGCTG  | GAAAAGGACA | 0.02 | //   |
| 44        | 64915771  | c.887+7354T>A                   | rs1152908   | AGCGTATAGT  | TATAATTATA | 0.38 | //   |

|           |          |                   |             |            |            |      |    |
|-----------|----------|-------------------|-------------|------------|------------|------|----|
| 45        | 64919287 | c.888-5246T>C     | rs1152911   | AACAGTCTTT | ATACAAGGGA | 0.08 | // |
| 46        | 64919431 | c.888-5102G>A     | rs17826057  | CAAAAGACTA | AAAAACTGAG | 0.07 | // |
| 47        | 64919952 | c.888-4581T>C     | rs11176095  | TGTCTTAAAA | GTCTGGAAAA | 0.08 | // |
| <b>48</b> | 64920175 | c.888-4358G>A     | rs1152912   | TGGCCAGCCT | TATCCTTAA  | 0.42 | // |
| 49        | 64920682 | c.888-3851T>A     | rs1152913   | CAGACAGCAC | TGTGTGCTGT | 0.44 | // |
| 50        | 64920772 | c.888-3761T>C     | rs1152914   | CCCTCTTCCC | AGGTCCTTCT | 0.05 | ** |
| 51        | 64920868 | c.888-3652TA(6_8) | ss289570835 | TATACCCACA | AAATATATCG | 0.05 | §§ |
| 52        | 64920925 | c.888-3608A>C     | rs1152915   | GTATATATAT | TCTCTCTCTT | 0.26 | ** |
| 53        | 64921571 | c.888-2962A>T     | rs1152916   | TTAAGGTTGA | GCAGGGGAAA | 0.45 | // |
| 54        | 64922569 | c.888-1964C>T     | rs1152918   | TGGGGGTGTG | GAGGCCCAGG | 0.05 | // |
| 55        | 64923752 | c.888-781C>T      | rs3782348   | CTGAGGCTTA | ATGGCGAAGG | 0.05 | // |
| 56        | 64924916 | c.1087-79A>G      | rs11176097  | AACTATATTC | TAGTCATGGT | 0.03 | // |
| 57        | 64928242 | c.*21A>G          | rs7135413   | ATAAAGAAAA | AGCAAGTATT | 0.03 | // |
| <b>58</b> | 64930378 | *2157T>C          | rs10506481  | GTTAATCATA | TCACATTAGA | 0.09 | // |
| 59        | 64932466 | *4245G>T          | rs7972963   | GTCATTTGTT | ATTCCACAGA | 0.08 | // |

\*According to NCBI build 36; †Flanking sequences; ‡Minor allele frequency; §Validation status as October 2009: frequency available, //; 1000 genomes Project, \*\*; unknown or by 2-hit as in dbSNP build 129, ††; described here for the first time, §§.

**Table E3.** Summary of quality control measures for genotyped *IRAK3* gene tSNPs

| rs/ss#      | Location (effect)  | Position* | CR† (%) | CAC‡ (%) | HWE§ controls | HWE§ cases |
|-------------|--------------------|-----------|---------|----------|---------------|------------|
| ss289570834 | Intron 1           | 64871319  | 95      | 98       | 0.295         | 0.295      |
| rs11465955  | Intron 3           | 64889666  | 91      | 98       | 0.295         | 0.295      |
| rs1152888   | Exon 5 (Val147Ile) | 64891495  | 94      | 99       | 0.355         | 0.303      |
| rs1624395   | Intron 6           | 64904483  | 95      | 98       | 0.295         | 0.295      |
| rs1370128   | Intron 6           | 64904905  | 95      | 97       | 0.295         | 0.295      |
| rs1152912   | Intron 8           | 64920175  | 95      | 94       | 0.063         | 0.295      |
| rs10506481  | 3' flanking region | 64930378  | 94      | 91       | 0.295         | 0.063      |

\*According to NCBI build 36; †Completion rate; ‡Average confidence of automatic calls; §Hardy-Weinberg equilibrium *p*-values.



**Table E4.** Genotype counts of genotyped SNPs associated with ALI.

| rs#        | Ref. allele/Risk allele | ALI |     |     | non-ALI |     |     |
|------------|-------------------------|-----|-----|-----|---------|-----|-----|
|            |                         | 1/1 | 1/2 | 2/2 | 1/1     | 1/2 | 2/2 |
| rs1732887  | A/G                     | 103 | 63  | 12  | 21      | 9   | 0   |
| rs1732886  | A/G                     | 102 | 63  | 13  | 21      | 9   | 0   |
| rs10506481 | C/T                     | 2   | 28  | 139 | 4       | 6   | 20  |

**Table E5.** Final regression models used to adjust *IRAK3* SNP associations with ALI.

|                                                        | <i>p</i> -value | OR   | 95% CI |       |
|--------------------------------------------------------|-----------------|------|--------|-------|
|                                                        |                 |      | Lower  | Upper |
| <b>(A)</b> Regression model for rs10506481 (T as risk) |                 |      |        |       |
| rs10506481                                             | <b>0.021</b>    | 2.50 | 1.15   | 5.47  |
| Gender                                                 | 0.073           | 2.38 | 0.92   | 6.17  |
| ICU mortality                                          | <b>0.002</b>    | 8.46 | 2.25   | 31.81 |
| Source of infection                                    | <b>0.011</b>    | 0.07 | 0.10   | 0.54  |
| <b>(B)</b> Regression model for rs1732887 (G as risk)  |                 |      |        |       |
| rs1732887                                              | 0.053           | 2.37 | 0.99   | 5.65  |
| Gender                                                 | 0.074           | 2.37 | 0.92   | 60.09 |
| ICU mortality                                          | <b>0.001</b>    | 8.48 | 2.34   | 30.76 |
| Source of infection                                    | <b>0.017</b>    | 0.08 | 0.01   | 0.63  |
| <b>(C)</b> Regression model for rs1732886 (G as risk)  |                 |      |        |       |
| rs1732886                                              | <b>0.033</b>    | 2.57 | 1.02   | 6.10  |
| Gender                                                 | 0.063           | 2.46 | 0.95   | 6.38  |
| ICU mortality                                          | <b>0.001</b>    | 8.82 | 2.42   | 32.11 |
| Source of infection                                    | <b>0.016</b>    | 0.08 | 0.01   | 0.62  |

Significant *p*-values in bold.

**Table E6.** Association of imputed SNPs of *IRAK3* gene with ALI.

| rs#        | Position* | MAF <sup>†</sup> |       | <i>p</i> -value |
|------------|-----------|------------------|-------|-----------------|
|            |           | non-ALI          | ALI   |                 |
| rs1732888  | 64867853  | 0.141            | 0.269 | <b>0.009</b>    |
| rs1732887  | 64867883  | 0.138            | 0.265 | <b>0.010</b>    |
| rs1732886  | 64870029  | 0.165            | 0.299 | <b>0.012</b>    |
| rs56156535 | 64872409  | 0.410            | 0.389 | 0.713           |
| rs4762088  | 64877849  | 0.373            | 0.396 | 0.703           |
| rs17767286 | 64878509  | 0.378            | 0.359 | 0.772           |
| rs17767298 | 64879508  | 0.362            | 0.343 | 0.759           |
| rs1882200  | 64883968  | 0.331            | 0.314 | 0.785           |
| rs2289134  | 64884954  | 0.377            | 0.363 | 0.791           |
| rs1732877  | 64885411  | 0.460            | 0.416 | 0.520           |
| rs2293657  | 64891273  | 0.325            | 0.312 | 0.827           |
| rs1821777  | 64892495  | 0.338            | 0.327 | 0.868           |
| rs55715236 | 64904334  | 0.325            | 0.312 | 0.812           |
| rs1623665  | 64904449  | 0.462            | 0.406 | 0.387           |
| rs1370127  | 64904584  | 0.448            | 0.390 | 0.387           |
| rs10716217 | 64908730  | 0.448            | 0.400 | 0.507           |
| rs1152908  | 64915771  | 0.428            | 0.385 | 0.470           |

\*According to NCBI build 36; <sup>†</sup>Minor allele frequency. Significant *p*-values in bold.

**Table E7.** Association of *IRAK3* SNPs with quantitative measures of clinical severity.

| rs#        | Location (effect)  | Position* | Days in ICU <sup>‡</sup> | Organs failing <sup>‡</sup> | Apache II <sup>‡</sup> |
|------------|--------------------|-----------|--------------------------|-----------------------------|------------------------|
| rs1732887  | -1464A>G           | 64867883  | 0.063                    | 0.102                       | 0.771                  |
| rs1732886  | c.133+550A>G       | 64870029  | 0.051                    | 0.107                       | 0.751                  |
| rs10506481 | 3' flanking region | 64930378  | 0.388                    | 0.374                       | 0.702                  |

\*According to NCBI build 36; <sup>‡</sup>*p*-value from a linear regression model.
